# Supplementary material for: Synthesis, characterization and theoretical investigation of a new chalcohalide, Ba4GaS4F3
Source: Royal Society of Chemistry journal article supplement (doi:10.1039/d1dt00800e), 2021-01-01
Supplement: d1dt00800e1.pdf [file d1dt00800e1.pdf]

### Supporting information

#### Synthesis, Characterization and Theoretical Investigation of $\text{Ba}_4\text{GaS}_4\text{F}_3$ : A New Chalcohalide with 3D Network Structure

Hongbo Gao†<sup>a</sup>, Ruijiao Chen†<sup>b</sup>, Kewang Zhang<sup>c</sup>, Ailijiang Abudurusuli<sup>d,e</sup>,

Kangrong Lai\*<sup>a</sup> and Junjie Li\*<sup>d</sup>

[a] Department of Physics, Changji University, Changji, Xinjiang 831100, China.

[b] College of Chemistry and Chemical Engineering, Xinjiang Normal University,  
Urumqi, Xinjiang 830054, China.

[c] College of Physical Science and Technology, Xinjiang University, Urumqi,  
Xinjiang 830046, China.

[d] Key Laboratory of Functional Materials and Devices for Special Environments  
of CAS, Xinjiang Key Laboratory of Electronic Information Materials and Devices,  
Xinjiang Technical Institute of physics & Chemistry of CAS, Urumqi, Xinjiang 830011,  
China.

[e] University of Chinese Academy of Science, Beijing 100049, China.

To whom correspondence should be addressed: [laikr0212@163.com](mailto:laikr0212@163.com);  
[lijunjie@ms.xjb.ac.cn](mailto:lijunjie@ms.xjb.ac.cn)

† These authors contributed equally

Table S1 Atomic coordinates and equivalent isotropic displacement parameters of Ba<sub>4</sub>GaS<sub>4</sub>F<sub>3</sub>.  
 U(eq) is defined as one third of the trace of the orthogonalized U<sub>ij</sub> tensor.

| Atom | x          | y          | z          | U(eq)     |
|------|------------|------------|------------|-----------|
| Ba1  | 7055.7(2)  | 6820.9(2)  | 9711.0(2)  | 11.33(8)  |
| Ba2  | 4632.8(2)  | 6160.7(2)  | 5174.1(2)  | 11.98(8)  |
| Ba3  | 3725.1(2)  | 2852.0(2)  | 7941.0(2)  | 11.02(7)  |
| Ba4  | 2281.4(2)  | 5475.2(2)  | 9425.6(2)  | 11.89(8)  |
| Ga1  | 4496.3(3)  | 5836.1(3)  | 8367.8(3)  | 10.70(12) |
| S1   | 5753.3(7)  | 5638.4(8)  | 8882.7(7)  | 15.7(3)   |
| S2   | 4653.7(7)  | 6183.7(7)  | 7070.1(7)  | 12.2(3)   |
| S3   | 6313.1(8)  | 8232.4(7)  | 8880.2(7)  | 16.5(3)   |
| S4   | 3810.2(7)  | 4657.2(7)  | 8566.8(7)  | 15.1(3)   |
| F1   | 4698.7(15) | 1656.0(16) | 8089.5(15) | 13.5(6)   |
| F2   | 1856.1(16) | 5584.1(16) | 7961.4(15) | 15.2(6)   |
| F3   | 4267.8(16) | 4929.7(16) | 4318.6(15) | 14.7(6)   |

Table S2 Symmetry, selected bond lengths and angles of Ba<sub>4</sub>GaS<sub>4</sub>F<sub>3</sub>.

|               |            |                       |           |                       |           |
|---------------|------------|-----------------------|-----------|-----------------------|-----------|
| Ba(1)-S(1)#4  | 3.3862(19) | S(1)-Ba(1)-S(1)#4     | 134.55(4) | F(1)#3-Ba(3)-S(3)#12  | 137.10(6) |
| Ba(1)-S(1)    | 3.2514(15) | S(1)#11-Ba(3)-S(1)#8  | 96.53(3)  | F(1)-Ba(3)-S(4)       | 131.68(6) |
| Ba(1)-S(2)#4  | 3.2084(15) | S(1)#11-Ba(3)-S(4)#11 | 65.30(3)  | F(1)#13-Ba(3)-S(4)#11 | 125.89(6) |
| Ba(1)-S(3)    | 3.0101(14) | S(1)#8-Ba(3)-S(4)#11  | 82.02(4)  | F(1)#3-Ba(3)-S(4)#11  | 67.29(6)  |
| Ba(1)-F(1)#5  | 2.593(3)   | S(1)-Ga(1)-S(2)       | 107.63(5) | F(1)-Ba(3)-S(4)#11    | 68.94(6)  |
| Ba(1)-F(2)#3  | 2.616(3)   | S(2)-Ba(2)-S(2)#2     | 81.45(3)  | F(1)#13-Ba(3)-S(4)    | 69.38(6)  |
| Ba(1)-F(3)#1  | 2.759(3)   | S(2)#4-Ba(1)-S(1)     | 148.27(4) | F(1)#3-Ba(3)-S(4)     | 72.24(6)  |
| Ba(2)-S(2)#9  | 3.2465(15) | S(2)#4-Ba(1)-S(1)#4   | 68.56(3)  | F(1)#3-Ba(3)-F(1)#13  | 70.17(9)  |
| Ba(2)-S(2)    | 3.250(2)   | S(2)#5-Ba(4)-S3#15    | 79.13(3)  | F(1)-Ba(3)-F(1)#3     | 73.04(9)  |
| Ba(2)-S(2)#1  | 3.2795(15) | S(2)#5-Ba(4)-S(4)     | 142.03(3) | F(1)-Ba(3)-F(1)#13    | 67.83(10) |
| Ba(2)-S(3)#9  | 3.2315(18) | S(2)#5-Ba(4)-S(4)#5   | 73.09(3)  | F(2)#3-Ba(1)-F(3)#2   | 70.49(8)  |
| Ba(2)-F(2)#8  | 2.759(3)   | S(2)#6-Ba(2)-S(2)     | 81.95(3)  | F(2)-Ba(4)-S(2)#5     | 83.07(6)  |
| Ba(2)-F(3)#6  | 2.718(3)   | S(2)#6-Ba(2)-S(2)#2   | 87.84(3)  | F(2)#5-Ba(4)-S(2)#5   | 116.29(6) |
| Ba(2)-F(3)    | 2.590(3)   | S(3)-Ba(1)-S(1)#4     | 130.30(3) | F(2)-Ba(4)-S(3)#15    | 82.82(6)  |
| Ba(3)-S(1)#8  | 3.3857(18) | S(3)-Ba(1)-S(1)       | 89.53(4)  | F(2)#5-Ba(4)-S(3)#15  | 144.03(6) |
| Ba(3)-S(1)#10 | 3.3751(16) | S(3)-Ba(1)-S(2)#4     | 84.04(3)  | F(2)#5-Ba(4)-S(4)#5   | 77.70(7)  |
| Ba(3)-S(3)#11 | 3.2439(18) | S(3)#6-Ba(2)-S(2)#6   | 112.01(3) | F(2)-Ba(4)-S(4)       | 78.75(7)  |
| Ba(3)-S(4)    | 3.1907(15) | S(3)#6-Ba(2)-S(2)#2   | 67.69(4)  | F(2)-Ba(4)-S(4)#5     | 150.82(6) |
| Ba(3)-S(4)#10 | 3.4085(15) | S(3)#6-Ba(2)-S(2)     | 144.90(4) | F(2)#5-Ba(4)-S(4)     | 100.96(6) |
| Ba(3)-F(1)#12 | 2.757(3)   | S(3)#12-Ba(3)-S(1)#11 | 116.18(3) | F(2)-Ba(4)-F(2)#5     | 129.16(7) |
| Ba(3)-F(1)    | 2.577(3)   | S(3)#12-Ba(3)-S(1)#8  | 72.37(5)  | F(2)-Ba(4)-F(3)#14    | 71.96(8)  |
| Ba(3)-F(1)#3  | 2.620(3)   | S(3)#12-Ba(3)-S(4)#11 | 154.38(3) | F(2)#5-Ba(4)-F(3)#14  | 69.30(8)  |
| Ba(4)-S(2)#5  | 3.2289(15) | S(3)#15-Ga(1)-S(1)    | 119.85(6) | F(2)#3-Ba(1)-S(1)     | 86.20(6)  |
| Ba(4)-S(3)#13 | 3.3098(16) | S(3)#15-Ga(1)-S(2)    | 105.85(5) | F(2)#3-Ba(1)-S(1)#4   | 73.78(6)  |
| Ba(4)-S(4)#5  | 3.2728(19) | S(3)#15-Ga(1)-S(4)    | 103.57(5) | F(2)#3-Ba(1)-S(2)#4   | 80.65(6)  |
| Ba(4)-S(4)    | 3.2372(15) | S(4)-Ba(3)-S(1)#11    | 74.89(3)  | F(2)#3-Ba(1)-S(3)     | 142.95(6) |
| Ba(4)-F(2)#5  | 2.643(3)   | S(4)-Ba(3)-S(1)#8     | 142.06(3) | F(2)#8-Ba(2)-S(2)#2   | 158.38(6) |
| Ba(4)-F(2)    | 2.614(3)   | S(4)-Ba(3)-S(3)#12    | 78.55(4)  | F(2)#8-Ba(2)-S(2)     | 80.52(6)  |
| Ba(4)-F(3)#14 | 2.669(3)   | S(4)-Ba(4)-S(3)#14    | 65.79(3)  | F(2)#8-Ba(2)-S(2)#6   | 77.94(6)  |
| Ga(1)-S(1)    | 2.2925(15) | S(4)#5-Ba(4)-S(3)#15  | 76.46(4)  | F(2)#8-Ba(2)-S(3)#6   | 132.80(6) |
| Ga(1)-S(2)    | 2.3129(18) | S(4)-Ba(4)-S(4)#5     | 110.18(3) | F(3)#2-Ba(1)-S(1)#4   | 129.64(7) |
| Ga(1)-S(3)#13 | 2.2321(14) | S(4)-Ba(3)-S(4)#11    | 123.99(3) | F(3)#2-Ba(1)-S(2)#4   | 71.57(6)  |
| Ga(1)-S(4)    | 2.2936(15) | S(4)-Ga(1)-S(2)       | 114.39(5) | F(3)-Ba(2)-S(2)#2     | 132.35(6) |
|               |            | F(1)#5-Ba(1)-S(1)#4   | 86.02(7)  | F(3)#10-Ba(2)-S(2)#6  | 149.30(6) |
|               |            | F(1)#5-Ba(1)-S(1)     | 83.25(6)  | F(3)-Ba(2)-S2#6       | 130.15(6) |

|                                                                                                                                                                                                                                                                                                                                                                                                                                                                                            |           |                       |           |
|--------------------------------------------------------------------------------------------------------------------------------------------------------------------------------------------------------------------------------------------------------------------------------------------------------------------------------------------------------------------------------------------------------------------------------------------------------------------------------------------|-----------|-----------------------|-----------|
| F(1)#5-Ba(1)-S(2)#4                                                                                                                                                                                                                                                                                                                                                                                                                                                                        | 124.80(6) | F(3)-Ba(2)-S(2)       | 125.30(6) |
| F(1)#5-Ba(1)-S(3)                                                                                                                                                                                                                                                                                                                                                                                                                                                                          | 76.52(7)  | F(3)#10-Ba(2)-S(2)#2  | 73.68(6)  |
| F(1)#5-Ba(1)-F(2)#3                                                                                                                                                                                                                                                                                                                                                                                                                                                                        | 139.03(8) | F(3)-Ba(2)-F(2)#8     | 68.66(8)  |
| F(1)#5-Ba(1)-F(3)#2                                                                                                                                                                                                                                                                                                                                                                                                                                                                        | 143.19(8) | F(3)#10-Ba(2)-F(2)#8  | 111.28(8) |
| F(1)-Ba(3)-S(3)#12                                                                                                                                                                                                                                                                                                                                                                                                                                                                         | 106.68(6) | F(3)-Ba(2)-F(3)#10    | 79.13(9)  |
| F(1)-Ba(3)-S(1)#8                                                                                                                                                                                                                                                                                                                                                                                                                                                                          | 80.79(6)  | F(3)#10-Ba(2)-S(2)    | 71.39(6)  |
| F(1)-Ba(3)-S(1)#11                                                                                                                                                                                                                                                                                                                                                                                                                                                                         | 134.06(6) | F(3)#10-Ba(2)-S(3)#6  | 83.81(6)  |
| F(1)#13-Ba(3)-S(1)#8                                                                                                                                                                                                                                                                                                                                                                                                                                                                       | 120.51(6) | F(3)-Ba(2)-S(3)#6     | 71.13(7)  |
| F(1)#3-Ba(3)-S(1)#8                                                                                                                                                                                                                                                                                                                                                                                                                                                                        | 145.05(6) | F(3)#14-Ba(4)-S(2)#5  | 75.15(6)  |
| F(1)#3-Ba(3)-S(1)#11                                                                                                                                                                                                                                                                                                                                                                                                                                                                       | 85.83(7)  | F(3)#14-Ba(4)-S(3)#15 | 145.69(6) |
| F(1)#13-Ba(3)-S(1)#11                                                                                                                                                                                                                                                                                                                                                                                                                                                                      | 141.48(6) | F(3)#14-Ba(4)-S(4)    | 128.37(6) |
| F(1)#13-Ba(3)-S(3)#12                                                                                                                                                                                                                                                                                                                                                                                                                                                                      | 70.47(6)  | F(3)#14-Ba(4)-S(4)#5  | 116.20(6) |
| <sup>#11</sup> 1-X,1-Y,2-Z; <sup>#25</sup> 4-Y,1/4+X,5/4-Z; <sup>#31</sup> 4+Y,3/4-X,7/4-Z; <sup>#41</sup> 4+Y,5/4-X,1/4+Z; <sup>#53</sup> 4-Y,1/4+X,1/4+Z; <sup>#6-</sup> 1/4+Y,5/4-X,5/4-Z; <sup>#7-</sup> 1/2+X,+Y,3/2-Z; <sup>#8-</sup> 1/4+Y,3/4-X,-1/4+Z; <sup>#9</sup> 1/2-X,1-Y,-1/2+Z; <sup>#10</sup> 1-X,1-Y,1-Z; <sup>#113</sup> 4-Y,-1/4+X,7/4-Z; <sup>#125</sup> 4-Y,-1/4+X,-1/4+Z; <sup>#131</sup> -X,1/2-Y,+Z; <sup>#141</sup> 1/2-X,1-Y,1/2+Z; <sup>#151</sup> -X,3/2-Y,+Z |           |                       |           |

Table S3 Anisotropic displacement parameters of Ba<sub>4</sub>GaS<sub>4</sub>F<sub>3</sub>.

| Atom | U <sub>11</sub> | U <sub>22</sub> | U <sub>33</sub> | U <sub>23</sub> | U <sub>13</sub> | U <sub>12</sub> |
|------|-----------------|-----------------|-----------------|-----------------|-----------------|-----------------|
| Ba1  | 10.05(15)       | 12.37(16)       | 11.56(14)       | -0.22(12)       | -0.30(11)       | 1.40(11)        |
| Ba2  | 11.34(16)       | 12.14(16)       | 12.47(15)       | -2.67(11)       | 0.95(12)        | -0.25(11)       |
| Ba3  | 12.24(16)       | 10.74(15)       | 10.09(15)       | 0.03(11)        | -1.12(11)       | -0.22(11)       |
| Ba4  | 12.33(16)       | 13.15(16)       | 10.18(14)       | 1.32(12)        | -0.68(12)       | -0.54(12)       |
| Ga1  | 11.6(3)         | 10.8(3)         | 9.7(3)          | -1.3(2)         | 0.2(2)          | 1.3(2)          |
| S1   | 12.1(6)         | 17.9(7)         | 17.1(6)         | -3.6(5)         | -3.3(5)         | -0.6(5)         |
| S2   | 12.1(6)         | 13.8(7)         | 10.7(6)         | 0.0(5)          | 0.9(5)          | 0.4(5)          |
| S3   | 23.0(7)         | 12.8(7)         | 13.6(6)         | 0.1(5)          | -4.6(5)         | 6.0(5)          |
| S4   | 16.4(7)         | 9.4(6)          | 19.5(7)         | 0.3(5)          | -1.8(5)         | 0.9(5)          |
| F1   | 14.7(15)        | 13.3(15)        | 12.6(14)        | -1.0(12)        | 0.7(12)         | 2.0(11)         |
| F2   | 13.6(15)        | 18.2(16)        | 13.9(15)        | 0.4(12)         | -0.8(12)        | -0.4(12)        |
| F3   | 14.7(15)        | 14.2(15)        | 15.1(15)        | -0.7(12)        | -0.2(12)        | 1.0(12)         |

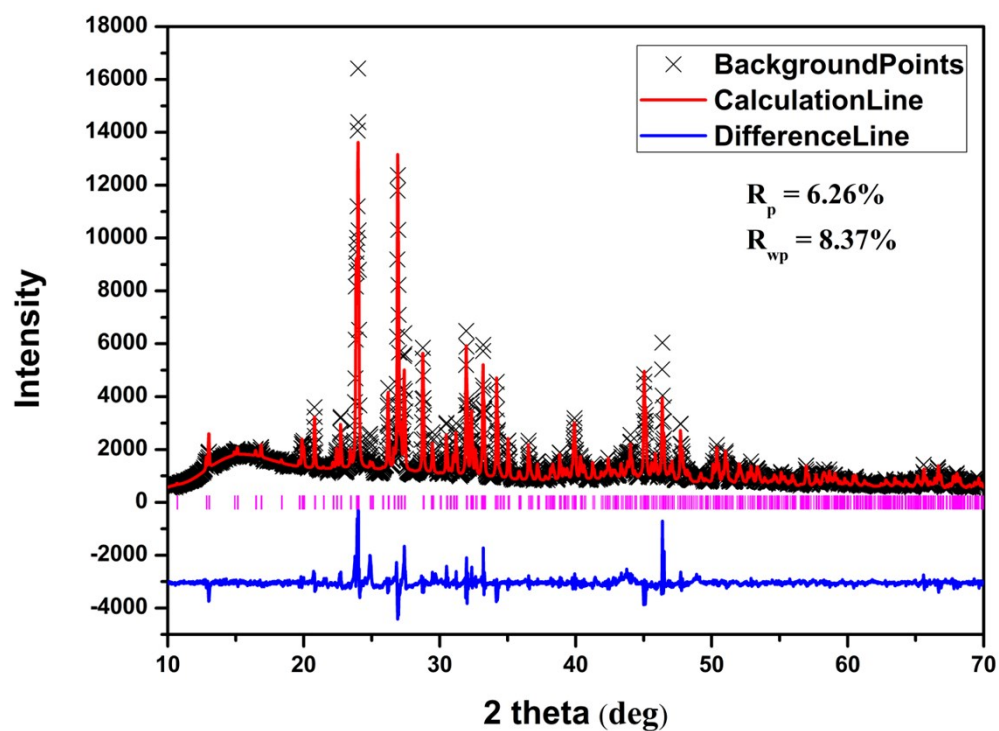

Figure S1 Experimental (black circles) and calculated (red line) PXRd patterns and the difference (blue line) for the PXRd Rietveld refinement of Ba<sub>4</sub>GaS<sub>4</sub>F<sub>3</sub>.

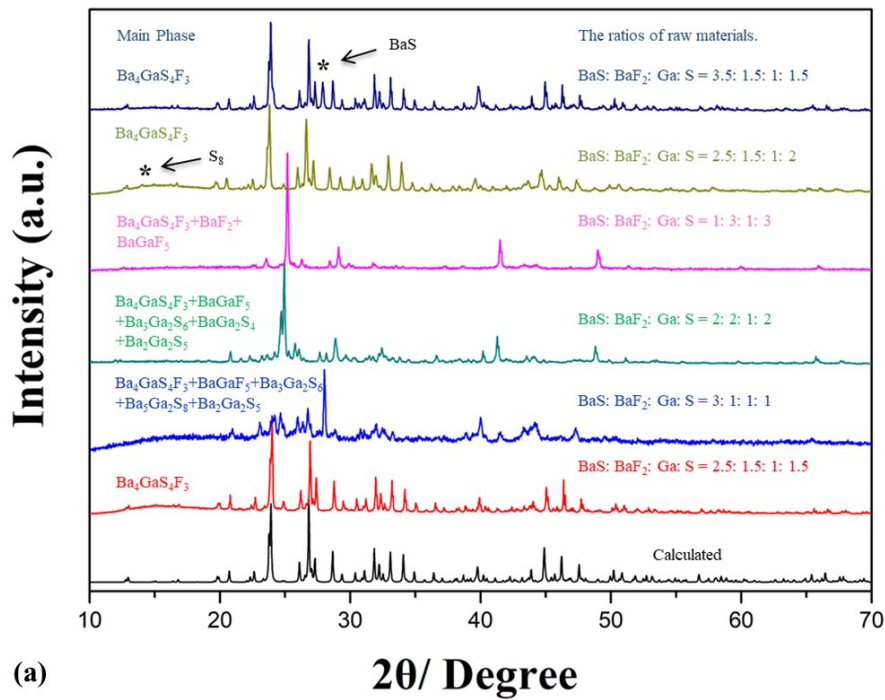

(a)

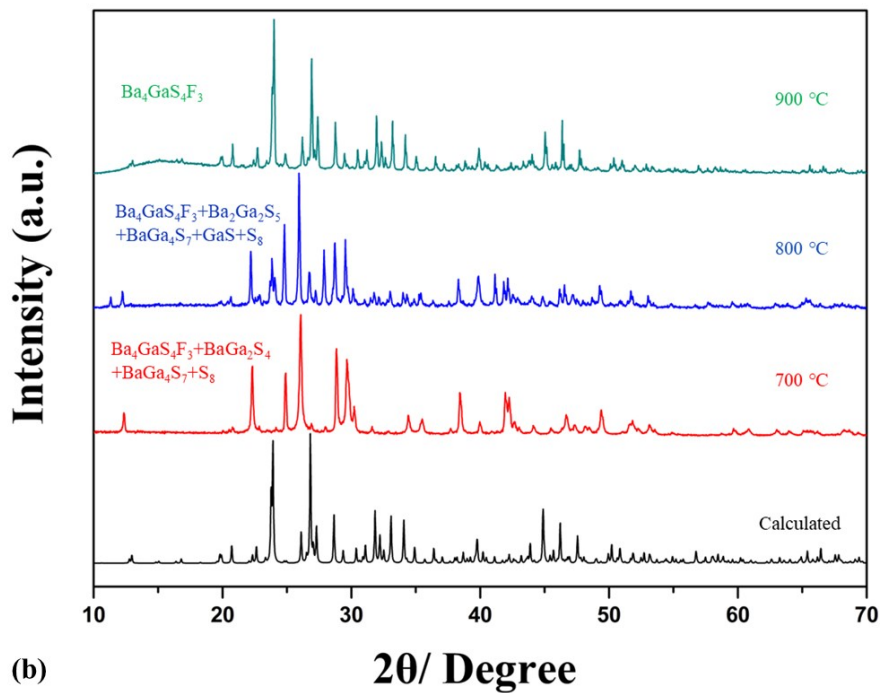

(b)

Figure S2 (a) The PXRD results of the obtained products under different raw materials ratios and (b) The PXRD results of the obtained products under different temperatures to synthesize the  $\text{Ba}_4\text{GaS}_4\text{F}_3$  pure phase powders. The theoretical XRD pattern of  $\text{Ba}_4\text{GaS}_4\text{F}_3$  is used as the reference.

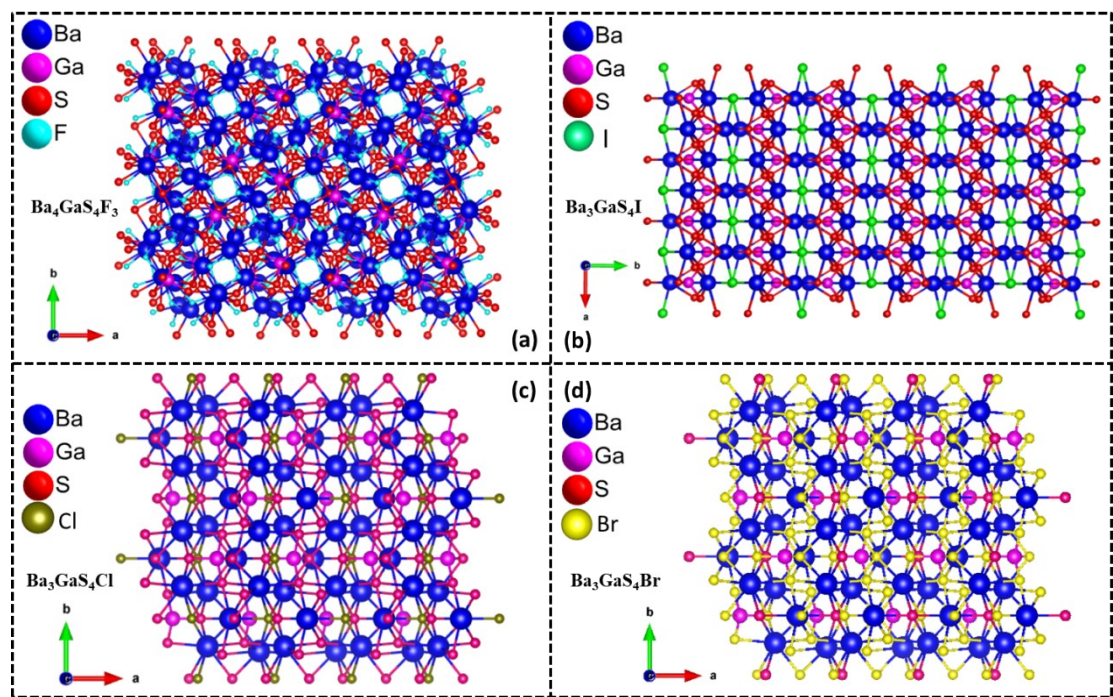

Figure S3 The structural contrast between  $Ba_4GaS_4F_3$  and  $Ba_3GaS_4X$  ( $X = Cl, Br, I$ ) along the  $c$ -axis. The 3D channel-like structure in  $Ba_4GaS_4F_3$  (a), The pseudolayer structures in  $Ba_3GaS_4I$  (b),  $Ba_3GaS_4Cl$  (c) and  $Ba_3GaS_4Br$  (d).
